# Supplementary material for: Effects of Hsian-tsao (Mesona procumbensHemsl.) extracts and its polysaccharides on the promotion of wound healing under diabetes-like conditions
Source: Royal Society of Chemistry journal article supplement (doi:10.1039/d0fo02180f), 2020-11-23
Supplement: d0fo02180f1.pdf [file d0fo02180f1.pdf]

## Supporting information

**Table S1.** Effects of various treatments on the body weight of C57BL/6 mice during the experimental period

| (g/mouse)            | Days post-wounding      |                         |                         |                         |                         |                         |
|----------------------|-------------------------|-------------------------|-------------------------|-------------------------|-------------------------|-------------------------|
|                      | 0                       | 3                       | 6                       | 9                       | 12                      | 15                      |
| Group 1 <sup>δ</sup> | 18.8 ± 0.5 <sup>b</sup> | 19.1 ± 0.4 <sup>b</sup> | 18.7 ± 0.4 <sup>b</sup> | 18.8 ± 0.4 <sup>b</sup> | 18.2 ± 0.5 <sup>b</sup> | 18.9 ± 0.5 <sup>b</sup> |
| Group 2              | 19.5 ± 0.4 <sup>b</sup> | 18.8 ± 0.6 <sup>b</sup> | 19.2 ± 0.5 <sup>b</sup> | 18.8 ± 0.4 <sup>b</sup> | 19.5 ± 0.5 <sup>b</sup> | 19.6 ± 0.6 <sup>b</sup> |
| Group 3              | 18.9 ± 0.3 <sup>b</sup> | 18.1 ± 0.4 <sup>b</sup> | 18.3 ± 0.4 <sup>b</sup> | 18.1 ± 0.4 <sup>b</sup> | 18.8 ± 0.4 <sup>b</sup> | 19.4 ± 0.4 <sup>b</sup> |
| Group 4              | 25.8 ± 0.3 <sup>a</sup> | 25.6 ± 0.5 <sup>a</sup> | 25.3 ± 0.3 <sup>a</sup> | 24.7 ± 0.5 <sup>a</sup> | 25.4 ± 0.4 <sup>a</sup> | 26.1 ± 0.4 <sup>a</sup> |
| Group 5              | 25.6 ± 0.6 <sup>a</sup> | 24.8 ± 0.7 <sup>a</sup> | 24.7 ± 0.4 <sup>a</sup> | 25.4 ± 0.6 <sup>a</sup> | 25.7 ± 0.6 <sup>a</sup> | 26.5 ± 0.6 <sup>a</sup> |

<sup>δ</sup>Group 1: DM-Saline/AG, Group 2: DM-EE (25 µg/mL)/WEP (25 µg/mL), Group 3: DM-EE (50 µg/mL)/WEP (50 µg/mL), Group 4: Normal-Saline/EE (25 µg/mL), Group 5: Normal-Saline/WEP (25 µg/mL). The results represent the mean ± SEM of  $n = 10$ . Groups with different superscript letters are significantly different at the same time ( $p < 0.05$ ).

**Table S2.** Effects of various treatments on the food intake of C57BL/6 mice during the experimental period

| (g/mouse/day)        | Days post-wounding     |                        |                         |                        |                        |
|----------------------|------------------------|------------------------|-------------------------|------------------------|------------------------|
|                      | 3                      | 6                      | 9                       | 12                     | 15                     |
| Group 1 <sup>δ</sup> | 4.1 ± 0.2 <sup>a</sup> | 4.4 ± 0.2 <sup>a</sup> | 4.7 ± 0.2 <sup>ab</sup> | 5.1 ± 0.1 <sup>a</sup> | 5.5 ± 0.2 <sup>a</sup> |
| Group 2              | 4.1 ± 0.2 <sup>a</sup> | 4.4 ± 0.1 <sup>a</sup> | 4.8 ± 0.2 <sup>a</sup>  | 5.2 ± 0.1 <sup>a</sup> | 5.3 ± 0.2 <sup>a</sup> |
| Group 3              | 3.9 ± 0.3 <sup>a</sup> | 4.2 ± 0.2 <sup>a</sup> | 4.7 ± 0.2 <sup>ab</sup> | 5.1 ± 0.2 <sup>a</sup> | 5.3 ± 0.2 <sup>a</sup> |
| Group 4              | 4.1 ± 0.1 <sup>a</sup> | 4.3 ± 0.2 <sup>a</sup> | 4.3 ± 0.1 <sup>ab</sup> | 4.3 ± 0.1 <sup>b</sup> | 4.4 ± 0.1 <sup>b</sup> |
| Group 5              | 4.0 ± 0.2 <sup>a</sup> | 4.3 ± 0.2 <sup>a</sup> | 4.2 ± 0.2 <sup>b</sup>  | 4.1 ± 0.1 <sup>b</sup> | 4.4 ± 0.1 <sup>b</sup> |

<sup>δ</sup>Group 1: DM-Saline/AG, Group 2: DM-EE (25 µg/mL)/WEP (25 µg/mL), Group 3: DM-EE (50 µg/mL)/WEP (50 µg/mL), Group 4: Normal-Saline/EE (25 µg/mL), Group 5: Normal-Saline/WEP (25 µg/mL). The results represent the mean ± SEM of  $n = 10$ . Groups with different superscript letters are significantly different at the same time ( $p < 0.05$ ).

**Table S3.** Effects of various treatments on the water intake of C57BL/6 mice during the experimental period

| (mL/mouse/day)       | Days post-wounding      |                        |                         |                        |                         |
|----------------------|-------------------------|------------------------|-------------------------|------------------------|-------------------------|
|                      | 3                       | 6                      | 9                       | 12                     | 15                      |
| Group 1 <sup>δ</sup> | 6.7 ± 0.3 <sup>a</sup>  | 7.6 ± 0.2 <sup>a</sup> | 7.4 ± 0.3 <sup>a</sup>  | 7.8 ± 0.5 <sup>a</sup> | 7.9 ± 0.4 <sup>a</sup>  |
| Group 2              | 6.9 ± 0.3 <sup>a</sup>  | 7.6 ± 0.3 <sup>a</sup> | 7.0 ± 0.2 <sup>ab</sup> | 7.3 ± 0.3 <sup>a</sup> | 7.6 ± 0.3 <sup>a</sup>  |
| Group 3              | 6.5 ± 0.5 <sup>a</sup>  | 7.5 ± 0.3 <sup>a</sup> | 7.6 ± 0.2 <sup>a</sup>  | 7.5 ± 0.2 <sup>a</sup> | 7.5 ± 0.3 <sup>a</sup>  |
| Group 4              | 5.7 ± 0.3 <sup>ab</sup> | 5.9 ± 0.3 <sup>b</sup> | 5.6 ± 0.3 <sup>c</sup>  | 6.1 ± 0.2 <sup>b</sup> | 6.3 ± 0.3 <sup>bc</sup> |
| Group 5              | 5.0 ± 0.3 <sup>b</sup>  | 5.3 ± 0.2 <sup>b</sup> | 6.3 ± 0.2 <sup>bc</sup> | 6.1 ± 0.2 <sup>b</sup> | 5.9 ± 0.3 <sup>c</sup>  |

<sup>δ</sup>Group 1: DM-Saline/AG, Group 2: DM-EE (25 µg/mL)/WEP (25 µg/mL), Group 3: DM-EE (50 µg/mL)/WEP (50 µg/mL), Group 4: Normal-Saline/EE (25 µg/mL), Group 5: Normal-Saline/WEP (25 µg/mL). The  represent the mean ± SEM of  $n = 10$ . Groups with different superscript letters are significantly different at the same time ( $p < 0.05$ ).

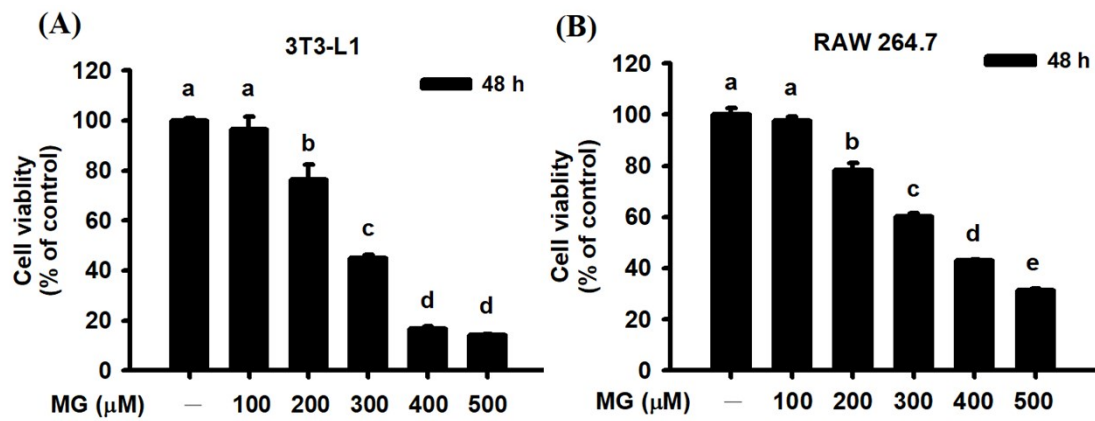

**Figure S1.** Effects of MG on the cell viability of RAW 264.7 cells. Cells were treated with various concentrations (0–500 μM) of MG under high glucose (25 mM) conditions for 48 h. The results represent the mean ± SD of  $n = 3$ . Groups with different letters superscripts are significantly different ( $p < 0.05$ ).

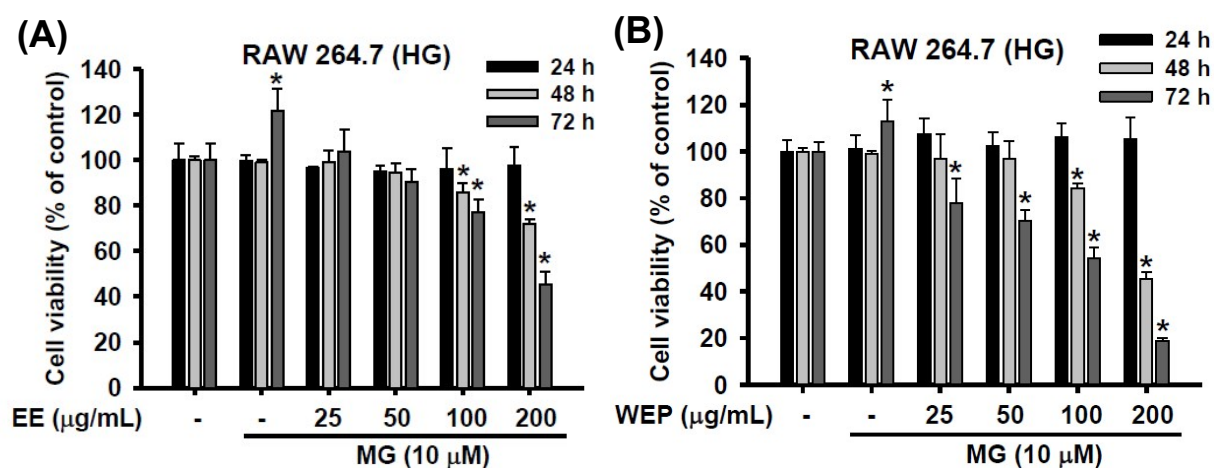

**Figure S2.** Effects of (A) EE and (B) WEP on the cell viability of RAW 264.7 cells under high glucose-MG conditions. Cells were treated with various concentrations (0–200 µg/mL) of EE and WEP in high glucose (HG, 25 mM) and MG (10 µM) conditions for 24, 48 or 72 h. The results represent the mean  $\pm$  SD of  $n = 3$ . \* $p < 0.05$ , compared to control.

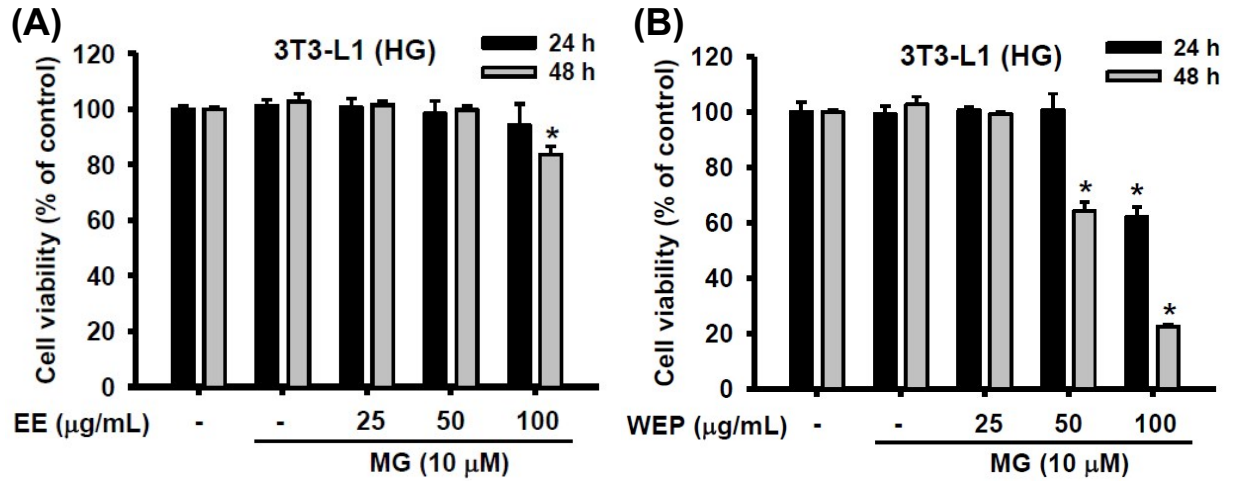

**Figure S3.** Effects of (A) EE and (B) WEP on the cell viability of 3T3-L1 cells under high glucose-MG conditions. Cells were treated with various concentrations (0–100 µg/mL) of EE and WEP in high glucose (HG, 25 mM) and MG (10 µM) conditions for 24 or 48 h, respectively. The results represent the mean  $\pm$  SD of  $n = 3$ . \* $p < 0.05$ , compared to control.

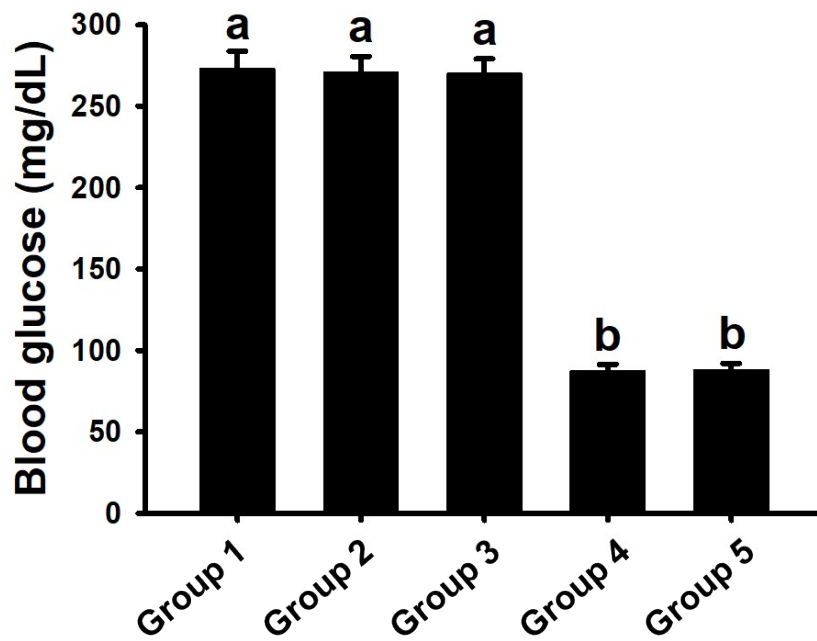

**Figure S4.** The levels of blood glucose in diabetic and normal mice before skin wounding. Data are presented as the mean  $\pm$  SEM of  $n = 10$ . Group 1: DM-Saline/AG, Group 2: DM-EE (25  $\mu$ g/mL)/WEP (25  $\mu$ g/mL), Group 3: DM-EE (50  $\mu$ g/mL)/WEP (50  $\mu$ g/mL), Group 4: Normal-Saline/EE (25  $\mu$ g/mL), Group 5: Normal-Saline/WEP (25  $\mu$ g/mL). Groups with different superscript letters are significantly different ( $p < 0.05$ ).
